# Supplementary material
Source: PubMed Central journal article supplement (PMC6340040)
Supplement: 4f3de4503cc362976789fa57b1c7847e_JVI.01419-18-s0001.pdf [file 4f3de4503cc362976789fa57b1c7847e_JVI.01419-18-s0001.pdf]

**Table S1.** Absolute HHV-6B gene transcript counts for all detected gene transcripts.

| Transcript | Case 1 | Case 2 | Case 3 | Case 7 | DLBCL I | DLBCL II | SupT1 CD4+ T cells |
|------------|--------|--------|--------|--------|---------|----------|--------------------|
| Dr1        | 0      | 0      | 0      | 0      | 43      | 20       | 0                  |
| Dr3        | 0      | 0      | 0      | 0      | 0       | 0        | 0                  |
| B1         | 0      | 0      | 0      | 0      | 0       | 0        | 0                  |
| B2         | 0      | 0      | 0      | 0      | 0       | 0        | 0                  |
| DR6        | 0      | 0      | 0      | 0      | 104     | 52       | 0                  |
| B3         | 0      | 0      | 0      | 0      | 0       | 0        | 0                  |
| B4         | 0      | 0      | 0      | 0      | 0       | 0        | 102                |
| B5         | 0      | 0      | 0      | 0      | 0       | 0        | 446                |
| U4         | 0      | 8      | 0      | 2      | 50      | 23       | 5974               |
| U3         | 0      | 20     | 0      | 22     | 48      | 22       | 5420               |
| U2         | 0      | 18     | 0      | 38     | 32      | 15       | 4814               |
| U8         | 0      | 28     | 0      | 28     | 73      | 35       | 4590               |
| U7         | 0      | 72     | 0      | 102    | 245     | 114      | 14206              |
| U6         | 0      | 0      | 0      | 0      | 0       | 0        | 0                  |
| U9         | 0      | 0      | 0      | 0      | 21      | 10       | 782                |
| U10        | 0      | 32     | 0      | 28     | 127     | 63       | 10434              |
| U11        | 0      | 36     | 0      | 48     | 291     | 123      | 42618              |
| U12        | 0      | 4      | 0      | 4      | 14      | 7        | 1814               |
| U13        | 0      | 0      | 0      | 0      | 0       | 0        | 350                |
| U14        | 0      | 66     | 0      | 40     | 573     | 245      | 42596              |
| U15        | 0      | 0      | 0      | 0      | 72      | 37       | 3156               |
| U16        | 0      | 6      | 0      | 4      | 55      | 29       | 4430               |
| U19        | 0      | 28     | 0      | 80     | 125     | 56       | 8372               |
| U18        | 0      | 50     | 0      | 82     | 188     | 73       | 7010               |
| U25        | 0      | 2      | 0      | 6      | 37      | 12       | 6512               |
| U24A       | 0      | 0      | 0      | 0      | 60      | 33       | 220                |
| U24        | 0      | 0      | 0      | 0      | 138     | 59       | 1450               |
| U23        | 0      | 0      | 0      | 0      | 87      | 36       | 7920               |
| U22        | 0      | 4      | 0      | 0      | 15      | 9        | 4294               |
| U21        | 0      | 38     | 0      | 48     | 128     | 58       | 23932              |
| U20        | 0      | 10     | 0      | 10     | 93      | 42       | 5902               |
| U27        | 0      | 26     | 0      | 52     | 323     | 141      | 18594              |
| U26        | 0      | 36     | 0      | 70     | 199     | 85       | 17000              |
| U29        | 0      | 4      | 0      | 0      | 47      | 24       | 4008               |
| U28        | 0      | 8      | 0      | 2      | 178     | 78       | 12938              |
| U30        | 0      | 8      | 0      | 8      | 130     | 63       | 10882              |
| U31        | 0      | 20     | 0      | 24     | 476     | 204      | 29514              |
| U35        | 0      | 0      | 0      | 0      | 18      | 6        | 604                |
| U34        | 0      | 0      | 0      | 4      | 67      | 33       | 6144               |
| U33        | 0      | 4      | 0      | 2      | 68      | 30       | 6306               |
| U32        | 0      | 2      | 0      | 2      | 42      | 18       | 1312               |
| U36        | 0      | 0      | 0      | 2      | 96      | 45       | 5320               |
| U37        | 0      | 6      | 0      | 0      | 204     | 79       | 12188              |
| U41        | 0      | 48     | 0      | 120    | 498     | 234      | 48430              |

|     |   |    |   |     |     |     |       |
|-----|---|----|---|-----|-----|-----|-------|
| U40 | 0 | 0  | 0 | 10  | 116 | 56  | 9168  |
| U39 | 0 | 4  | 0 | 6   | 211 | 85  | 19188 |
| U38 | 2 | 58 | 8 | 102 | 445 | 211 | 40148 |
| U43 | 0 | 6  | 0 | 30  | 180 | 69  | 14340 |
| U42 | 0 | 80 | 0 | 114 | 313 | 146 | 21200 |
| U44 | 0 | 4  | 0 | 6   | 63  | 25  | 5448  |
| U45 | 0 | 14 | 0 | 16  | 80  | 37  | 5924  |
| U46 | 0 | 2  | 0 | 2   | 35  | 17  | 1912  |
| U47 | 0 | 8  | 0 | 16  | 242 | 115 | 30482 |
| U48 | 0 | 10 | 0 | 10  | 329 | 137 | 21390 |
| U49 | 0 | 0  | 0 | 0   | 62  | 22  | 2842  |
| U50 | 0 | 8  | 0 | 2   | 92  | 40  | 9414  |
| U51 | 0 | 48 | 0 | 58  | 263 | 115 | 16976 |
| U52 | 0 | 2  | 0 | 8   | 64  | 26  | 3882  |
| U53 | 0 | 8  | 0 | 14  | 233 | 97  | 22950 |
| U57 | 0 | 12 | 0 | 16  | 726 | 356 | 36270 |
| U56 | 0 | 16 | 0 | 6   | 218 | 98  | 14784 |
| U55 | 0 | 6  | 0 | 4   | 94  | 36  | 7610  |
| U54 | 0 | 24 | 0 | 32  | 438 | 185 | 31510 |
| U58 | 0 | 6  | 0 | 4   | 85  | 41  | 5534  |
| U59 | 0 | 2  | 0 | 4   | 94  | 46  | 6252  |
| U66 | 0 | 2  | 0 | 0   | 60  | 20  | 5122  |
| U62 | 0 | 0  | 0 | 0   | 20  | 9   | 356   |
| U63 | 0 | 4  | 0 | 4   | 37  | 17  | 2912  |
| U64 | 0 | 2  | 0 | 2   | 37  | 18  | 6750  |
| U65 | 0 | 2  | 0 | 6   | 98  | 40  | 9974  |
| U67 | 0 | 8  | 0 | 6   | 31  | 11  | 3312  |
| U68 | 0 | 2  | 0 | 2   | 25  | 11  | 1780  |
| U69 | 0 | 22 | 0 | 68  | 420 | 192 | 24524 |
| U70 | 0 | 12 | 0 | 18  | 282 | 125 | 20248 |
| U71 | 0 | 0  | 0 | 2   | 50  | 21  | 1654  |
| U72 | 0 | 0  | 0 | 0   | 178 | 78  | 16374 |
| U73 | 0 | 12 | 0 | 20  | 188 | 83  | 11284 |
| U74 | 0 | 24 | 0 | 44  | 161 | 73  | 10846 |
| U76 | 0 | 2  | 0 | 4   | 92  | 39  | 11556 |
| U75 | 0 | 0  | 0 | 0   | 48  | 20  | 6770  |
| U77 | 0 | 6  | 0 | 10  | 66  | 31  | 5532  |
| B6  | 0 | 0  | 0 | 0   | 18  | 12  | 182   |
| B7  | 0 | 0  | 0 | 0   | 57  | 31  | 182   |
| U79 | 0 | 76 | 0 | 82  | 692 | 313 | 30948 |
| U81 | 0 | 6  | 0 | 12  | 121 | 59  | 15320 |
| U82 | 0 | 0  | 0 | 0   | 54  | 26  | 9330  |
| U83 | 0 | 0  | 0 | 0   | 133 | 54  | 4688  |
| U85 | 0 | 18 | 0 | 16  | 83  | 38  | 3542  |
| U84 | 0 | 26 | 0 | 30  | 98  | 45  | 6580  |
| U86 | 0 | 30 | 0 | 50  | 313 | 147 | 33116 |
| U90 | 0 | 32 | 0 | 50  | 563 | 278 | 17548 |
| U91 | 0 | 18 | 0 | 46  | 626 | 213 | 3486  |

|      |   |    |   |    |     |     |       |
|------|---|----|---|----|-----|-----|-------|
| B8   | 0 | 0  | 0 | 0  | 0   | 0   | 512   |
| U94  | 0 | 0  | 0 | 0  | 26  | 13  | 1156  |
| U95  | 0 | 38 | 0 | 72 | 783 | 363 | 33100 |
| U100 | 0 | 2  | 0 | 4  | 267 | 105 | 39370 |
| B9   | 0 | 0  | 0 | 0  | 0   | 0   | 1914  |

---

Genes are color coded to indicate temporal class of expression, where blue indicates immediate early genes, green indicates late genes, and orange indicates early genes. Unclassified genes remain in black.

**Table S2.** Normalized HHV-6B gene transcript counts (viral reads per million unique mapped genomic reads) for all detected HHV-6B gene transcripts.

| Transcript | Case 1 | Case 2   | Case 3 | Case 7   | DLBCL I | DLBCL II | SupT1 CD4+ T cells |
|------------|--------|----------|--------|----------|---------|----------|--------------------|
| Dr1        | 0      | 0        | 0      | 0        | 0.26875 | 0.063492 | 0                  |
| Dr3        | 0      | 0        | 0      | 0        | 0       | 0        | 0                  |
| B1         | 0      | 0        | 0      | 0        | 0       | 0        | 0                  |
| B2         | 0      | 0        | 0      | 0        | 0       | 0        | 0                  |
| DR6        | 0      | 0        | 0      | 0        | 0.65    | 0.165079 | 0                  |
| B3         | 0      | 0        | 0      | 0        | 0       | 0        | 0                  |
| B4         | 0      | 0        | 0      | 0        | 0       | 0        | 0.684564           |
| B5         | 0      | 0        | 0      | 0        | 0       | 0        | 2.993289           |
| U4         | 0      | 0.09206  | 0      | 0.020833 | 0.3125  | 0.073016 | 40.09396           |
| U3         | 0      | 0.23015  | 0      | 0.229167 | 0.3     | 0.069841 | 36.37584           |
| U2         | 0      | 0.207135 | 0      | 0.395833 | 0.2     | 0.047619 | 32.30872           |
| U8         | 0      | 0.322209 | 0      | 0.291667 | 0.45625 | 0.111111 | 30.80537           |
| U7         | 0      | 0.828539 | 0      | 1.0625   | 1.53125 | 0.361905 | 95.34228           |
| U6         | 0      | 0        | 0      | 0        | 0       | 0        | 0                  |
| U9         | 0      | 0        | 0      | 0        | 0.13125 | 0.031746 | 5.248322           |
| U10        | 0      | 0.368239 | 0      | 0.291667 | 0.79375 | 0.2      | 70.02685           |
| U11        | 0      | 0.414269 | 0      | 0.5      | 1.81875 | 0.390476 | 286.0268           |
| U12        | 0      | 0.04603  | 0      | 0.041667 | 0.0875  | 0.022222 | 12.1745            |
| U13        | 0      | 0        | 0      | 0        | 0       | 0        | 2.348993           |
| U14        | 0      | 0.759494 | 0      | 0.416667 | 3.58125 | 0.777778 | 285.8792           |
| U15        | 0      | 0        | 0      | 0        | 0.45    | 0.11746  | 21.18121           |
| U16        | 0      | 0.069045 | 0      | 0.041667 | 0.34375 | 0.092063 | 29.73154           |
| U19        | 0      | 0.322209 | 0      | 0.833333 | 0.78125 | 0.177778 | 56.18792           |
| U18        | 0      | 0.575374 | 0      | 0.854167 | 1.175   | 0.231746 | 47.04698           |
| U25        | 0      | 0.023015 | 0      | 0.0625   | 0.23125 | 0.038095 | 43.7047            |
| U24A       | 0      | 0        | 0      | 0        | 0.375   | 0.104762 | 1.47651            |
| U24        | 0      | 0        | 0      | 0        | 0.8625  | 0.187302 | 9.731544           |
| U23        | 0      | 0        | 0      | 0        | 0.54375 | 0.114286 | 53.15436           |
| U22        | 0      | 0.04603  | 0      | 0        | 0.09375 | 0.028571 | 28.81879           |
| U21        | 0      | 0.437284 | 0      | 0.5      | 0.8     | 0.184127 | 160.6174           |
| U20        | 0      | 0.115075 | 0      | 0.104167 | 0.58125 | 0.133333 | 39.61074           |
| U27        | 0      | 0.299194 | 0      | 0.541667 | 2.01875 | 0.447619 | 124.7919           |
| U26        | 0      | 0.414269 | 0      | 0.729167 | 1.24375 | 0.269841 | 114.094            |
| U29        | 0      | 0.04603  | 0      | 0        | 0.29375 | 0.07619  | 26.89933           |
| U28        | 0      | 0.09206  | 0      | 0.020833 | 1.1125  | 0.247619 | 86.83221           |
| U30        | 0      | 0.09206  | 0      | 0.083333 | 0.8125  | 0.2      | 73.03356           |
| U31        | 0      | 0.23015  | 0      | 0.25     | 2.975   | 0.647619 | 198.0805           |
| U35        | 0      | 0        | 0      | 0        | 0.1125  | 0.019048 | 4.053691           |
| U34        | 0      | 0        | 0      | 0.041667 | 0.41875 | 0.104762 | 41.2349            |
| U33        | 0      | 0.04603  | 0      | 0.020833 | 0.425   | 0.095238 | 42.32215           |
| U32        | 0      | 0.023015 | 0      | 0.020833 | 0.2625  | 0.057143 | 8.805369           |
| U36        | 0      | 0        | 0      | 0.020833 | 0.6     | 0.142857 | 35.7047            |
| U37        | 0      | 0.069045 | 0      | 0        | 1.275   | 0.250794 | 81.79866           |
| U41        | 0      | 0.552359 | 0      | 1.25     | 3.1125  | 0.742857 | 325.0336           |

|     |          |          |          |          |         |          |          |
|-----|----------|----------|----------|----------|---------|----------|----------|
| U40 | 0        | 0        | 0        | 0.104167 | 0.725   | 0.177778 | 61.5302  |
| U39 | 0        | 0.04603  | 0        | 0.0625   | 1.31875 | 0.269841 | 128.7785 |
| U38 | 0.017683 | 0.667434 | 0.030098 | 1.0625   | 2.78125 | 0.669841 | 269.4497 |
| U43 | 0        | 0.069045 | 0        | 0.3125   | 1.125   | 0.219048 | 96.24161 |
| U42 | 0        | 0.920598 | 0        | 1.1875   | 1.95625 | 0.463492 | 142.2819 |
| U44 | 0        | 0.04603  | 0        | 0.0625   | 0.39375 | 0.079365 | 36.56376 |
| U45 | 0        | 0.161105 | 0        | 0.166667 | 0.5     | 0.11746  | 39.75839 |
| U46 | 0        | 0.023015 | 0        | 0.020833 | 0.21875 | 0.053968 | 12.83221 |
| U47 | 0        | 0.09206  | 0        | 0.166667 | 1.5125  | 0.365079 | 204.5772 |
| U48 | 0        | 0.115075 | 0        | 0.104167 | 2.05625 | 0.434921 | 143.557  |
| U49 | 0        | 0        | 0        | 0        | 0.3875  | 0.069841 | 19.07383 |
| U50 | 0        | 0.09206  | 0        | 0.020833 | 0.575   | 0.126984 | 63.18121 |
| U51 | 0        | 0.552359 | 0        | 0.604167 | 1.64375 | 0.365079 | 113.9329 |
| U52 | 0        | 0.023015 | 0        | 0.083333 | 0.4     | 0.08254  | 26.05369 |
| U53 | 0        | 0.09206  | 0        | 0.145833 | 1.45625 | 0.307937 | 154.0268 |
| U57 | 0        | 0.13809  | 0        | 0.166667 | 4.5375  | 1.130159 | 243.4228 |
| U56 | 0        | 0.18412  | 0        | 0.0625   | 1.3625  | 0.311111 | 99.22148 |
| U55 | 0        | 0.069045 | 0        | 0.041667 | 0.5875  | 0.114286 | 51.07383 |
| U54 | 0        | 0.27618  | 0        | 0.333333 | 2.7375  | 0.587302 | 211.4765 |
| U58 | 0        | 0.069045 | 0        | 0.041667 | 0.53125 | 0.130159 | 37.14094 |
| U59 | 0        | 0.023015 | 0        | 0.041667 | 0.5875  | 0.146032 | 41.95973 |
| U66 | 0        | 0.023015 | 0        | 0        | 0.375   | 0.063492 | 34.37584 |
| U62 | 0        | 0        | 0        | 0        | 0.125   | 0.028571 | 2.389262 |
| U63 | 0        | 0.04603  | 0        | 0.041667 | 0.23125 | 0.053968 | 19.54362 |
| U64 | 0        | 0.023015 | 0        | 0.020833 | 0.23125 | 0.057143 | 45.30201 |
| U65 | 0        | 0.023015 | 0        | 0.0625   | 0.6125  | 0.126984 | 66.9396  |
| U67 | 0        | 0.09206  | 0        | 0.0625   | 0.19375 | 0.034921 | 22.22819 |
| U68 | 0        | 0.023015 | 0        | 0.020833 | 0.15625 | 0.034921 | 11.94631 |
| U69 | 0        | 0.253165 | 0        | 0.708333 | 2.625   | 0.609524 | 164.5906 |
| U70 | 0        | 0.13809  | 0        | 0.1875   | 1.7625  | 0.396825 | 135.8926 |
| U71 | 0        | 0        | 0        | 0.020833 | 0.3125  | 0.066667 | 11.10067 |
| U72 | 0        | 0        | 0        | 0        | 1.1125  | 0.247619 | 109.8926 |
| U73 | 0        | 0.13809  | 0        | 0.208333 | 1.175   | 0.263492 | 75.73154 |
| U74 | 0        | 0.27618  | 0        | 0.458333 | 1.00625 | 0.231746 | 72.79195 |
| U76 | 0        | 0.023015 | 0        | 0.041667 | 0.575   | 0.12381  | 77.55705 |
| U75 | 0        | 0        | 0        | 0        | 0.3     | 0.063492 | 45.43624 |
| U77 | 0        | 0.069045 | 0        | 0.104167 | 0.4125  | 0.098413 | 37.12752 |
| B6  | 0        | 0        | 0        | 0        | 0.1125  | 0.038095 | 1.221477 |
| B7  | 0        | 0        | 0        | 0        | 0.35625 | 0.098413 | 1.221477 |
| U79 | 0        | 0.874568 | 0        | 0.854167 | 4.325   | 0.993651 | 207.7047 |
| U81 | 0        | 0.069045 | 0        | 0.125    | 0.75625 | 0.187302 | 102.8188 |
| U82 | 0        | 0        | 0        | 0        | 0.3375  | 0.08254  | 62.61745 |
| U83 | 0        | 0        | 0        | 0        | 0.83125 | 0.171429 | 31.46309 |
| U85 | 0        | 0.207135 | 0        | 0.166667 | 0.51875 | 0.120635 | 23.77181 |
| U84 | 0        | 0.299194 | 0        | 0.3125   | 0.6125  | 0.142857 | 44.16107 |
| U86 | 0        | 0.345224 | 0        | 0.520833 | 1.95625 | 0.466667 | 222.255  |
| U90 | 0        | 0.368239 | 0        | 0.520833 | 3.51875 | 0.88254  | 117.7718 |
| U91 | 0        | 0.207135 | 0        | 0.479167 | 3.9125  | 0.67619  | 23.39597 |

|      |   |          |   |          |         |          |          |
|------|---|----------|---|----------|---------|----------|----------|
| B8   | 0 | 0        | 0 | 0        | 0       | 0        | 3.436242 |
| U94  | 0 | 0        | 0 | 0        | 0.1625  | 0.04127  | 7.758389 |
| U95  | 0 | 0.437284 | 0 | 0.75     | 4.89375 | 1.152381 | 222.1477 |
| U100 | 0 | 0.023015 | 0 | 0.041667 | 1.66875 | 0.333333 | 264.2282 |
| B9   | 0 | 0        | 0 | 0        | 0       | 0        | 12.84564 |

---

Genes are color coded to indicate temporal class of expression, where blue indicates immediate early genes, green indicates late genes, and orange indicates early genes. Unclassified genes remain in black.

**Table S3.** Relative HHV-6B gene transcript count detection (percentage of the total viral read count) for all detected HHV-6B gene transcripts.

| Transcript | Case 1 | Case 2 | Case 3 | Case 7 | DLBCL I | DLBCL II | SupT1 CD4+ T cells |
|------------|--------|--------|--------|--------|---------|----------|--------------------|
| Dr1        | 0.00   | 0.00   | 0.00   | 0.00   | 0.29    | 0.30     | 0.00               |
| Dr3        | 0.00   | 0.00   | 0.00   | 0.00   | 0.00    | 0.00     | 0.00               |
| B1         | 0.00   | 0.00   | 0.00   | 0.00   | 0.00    | 0.00     | 0.00               |
| B2         | 0.00   | 0.00   | 0.00   | 0.00   | 0.00    | 0.00     | 0.00               |
| DR6        | 0.00   | 0.00   | 0.00   | 0.00   | 0.69    | 0.78     | 0.00               |
| B3         | 0.00   | 0.00   | 0.00   | 0.00   | 0.00    | 0.00     | 0.00               |
| B4         | 0.00   | 0.00   | 0.00   | 0.00   | 0.00    | 0.00     | 0.01               |
| B5         | 0.00   | 0.00   | 0.00   | 0.00   | 0.00    | 0.00     | 0.04               |
| U4         | 0.00   | 0.64   | 0.00   | 0.11   | 0.33    | 0.35     | 0.57               |
| U3         | 0.00   | 1.61   | 0.00   | 1.20   | 0.32    | 0.33     | 0.52               |
| U2         | 0.00   | 1.44   | 0.00   | 2.07   | 0.21    | 0.23     | 0.46               |
| U8         | 0.00   | 2.25   | 0.00   | 1.53   | 0.49    | 0.53     | 0.44               |
| U7         | 0.00   | 5.78   | 0.00   | 5.56   | 1.64    | 1.71     | 1.36               |
| U6         | 0.00   | 0.00   | 0.00   | 0.00   | 0.00    | 0.00     | 0.00               |
| U9         | 0.00   | 0.00   | 0.00   | 0.00   | 0.14    | 0.15     | 0.07               |
| U10        | 0.00   | 2.57   | 0.00   | 1.53   | 0.85    | 0.95     | 1.00               |
| U11        | 0.00   | 2.89   | 0.00   | 2.61   | 1.94    | 1.85     | 4.07               |
| U12        | 0.00   | 0.32   | 0.00   | 0.22   | 0.09    | 0.11     | 0.17               |
| U13        | 0.00   | 0.00   | 0.00   | 0.00   | 0.00    | 0.00     | 0.03               |
| U14        | 0.00   | 5.30   | 0.00   | 2.18   | 3.83    | 3.68     | 4.07               |
| U15        | 0.00   | 0.00   | 0.00   | 0.00   | 0.48    | 0.56     | 0.30               |
| U16        | 0.00   | 0.48   | 0.00   | 0.22   | 0.37    | 0.44     | 0.42               |
| U19        | 0.00   | 2.25   | 0.00   | 4.36   | 0.83    | 0.84     | 0.80               |
| U18        | 0.00   | 4.01   | 0.00   | 4.47   | 1.26    | 1.10     | 0.67               |
| U25        | 0.00   | 0.16   | 0.00   | 0.33   | 0.25    | 0.18     | 0.62               |
| U24A       | 0.00   | 0.00   | 0.00   | 0.00   | 0.40    | 0.50     | 0.02               |
| U24        | 0.00   | 0.00   | 0.00   | 0.00   | 0.92    | 0.89     | 0.14               |
| U23        | 0.00   | 0.00   | 0.00   | 0.00   | 0.58    | 0.54     | 0.76               |
| U22        | 0.00   | 0.32   | 0.00   | 0.00   | 0.10    | 0.14     | 0.41               |
| U21        | 0.00   | 3.05   | 0.00   | 2.61   | 0.85    | 0.87     | 2.28               |
| U20        | 0.00   | 0.80   | 0.00   | 0.54   | 0.62    | 0.63     | 0.56               |
| U27        | 0.00   | 2.09   | 0.00   | 2.83   | 2.16    | 2.12     | 1.77               |
| U26        | 0.00   | 2.89   | 0.00   | 3.81   | 1.33    | 1.28     | 1.62               |
| U29        | 0.00   | 0.32   | 0.00   | 0.00   | 0.31    | 0.36     | 0.38               |
| U28        | 0.00   | 0.64   | 0.00   | 0.11   | 1.19    | 1.17     | 1.23               |
| U30        | 0.00   | 0.64   | 0.00   | 0.44   | 0.87    | 0.95     | 1.04               |
| U31        | 0.00   | 1.61   | 0.00   | 1.31   | 3.18    | 3.06     | 2.82               |
| U35        | 0.00   | 0.00   | 0.00   | 0.00   | 0.12    | 0.09     | 0.06               |
| U34        | 0.00   | 0.00   | 0.00   | 0.22   | 0.45    | 0.50     | 0.59               |
| U33        | 0.00   | 0.32   | 0.00   | 0.11   | 0.45    | 0.45     | 0.60               |
| U32        | 0.00   | 0.16   | 0.00   | 0.11   | 0.28    | 0.27     | 0.13               |
| U36        | 0.00   | 0.00   | 0.00   | 0.11   | 0.64    | 0.68     | 0.51               |
| U37        | 0.00   | 0.48   | 0.00   | 0.00   | 1.36    | 1.19     | 1.16               |
| U41        | 0.00   | 3.85   | 0.00   | 6.54   | 3.33    | 3.51     | 4.62               |

|     |        |      |        |      |      |      |      |
|-----|--------|------|--------|------|------|------|------|
| U40 | 0.00   | 0.00 | 0.00   | 0.54 | 0.77 | 0.84 | 0.87 |
| U39 | 0.00   | 0.32 | 0.00   | 0.33 | 1.41 | 1.28 | 1.83 |
| U38 | 100.00 | 4.65 | 100.00 | 5.56 | 2.97 | 3.17 | 3.83 |
| U43 | 0.00   | 0.48 | 0.00   | 1.63 | 1.20 | 1.04 | 1.37 |
| U42 | 0.00   | 6.42 | 0.00   | 6.21 | 2.09 | 2.19 | 2.02 |
| U44 | 0.00   | 0.32 | 0.00   | 0.33 | 0.42 | 0.38 | 0.52 |
| U45 | 0.00   | 1.12 | 0.00   | 0.87 | 0.53 | 0.56 | 0.57 |
| U46 | 0.00   | 0.16 | 0.00   | 0.11 | 0.23 | 0.26 | 0.18 |
| U47 | 0.00   | 0.64 | 0.00   | 0.87 | 1.62 | 1.73 | 2.91 |
| U48 | 0.00   | 0.80 | 0.00   | 0.54 | 2.20 | 2.06 | 2.04 |
| U49 | 0.00   | 0.00 | 0.00   | 0.00 | 0.41 | 0.33 | 0.27 |
| U50 | 0.00   | 0.64 | 0.00   | 0.11 | 0.61 | 0.60 | 0.90 |
| U51 | 0.00   | 3.85 | 0.00   | 3.16 | 1.76 | 1.73 | 1.62 |
| U52 | 0.00   | 0.16 | 0.00   | 0.44 | 0.43 | 0.39 | 0.37 |
| U53 | 0.00   | 0.64 | 0.00   | 0.76 | 1.56 | 1.46 | 2.19 |
| U57 | 0.00   | 0.96 | 0.00   | 0.87 | 4.85 | 5.35 | 3.46 |
| U56 | 0.00   | 1.28 | 0.00   | 0.33 | 1.46 | 1.47 | 1.41 |
| U55 | 0.00   | 0.48 | 0.00   | 0.22 | 0.63 | 0.54 | 0.73 |
| U54 | 0.00   | 1.93 | 0.00   | 1.74 | 2.92 | 2.78 | 3.01 |
| U58 | 0.00   | 0.48 | 0.00   | 0.22 | 0.57 | 0.62 | 0.53 |
| U59 | 0.00   | 0.16 | 0.00   | 0.22 | 0.63 | 0.69 | 0.60 |
| U66 | 0.00   | 0.16 | 0.00   | 0.00 | 0.40 | 0.30 | 0.49 |
| U62 | 0.00   | 0.00 | 0.00   | 0.00 | 0.13 | 0.14 | 0.03 |
| U63 | 0.00   | 0.32 | 0.00   | 0.22 | 0.25 | 0.26 | 0.28 |
| U64 | 0.00   | 0.16 | 0.00   | 0.11 | 0.25 | 0.27 | 0.64 |
| U65 | 0.00   | 0.16 | 0.00   | 0.33 | 0.65 | 0.60 | 0.95 |
| U67 | 0.00   | 0.64 | 0.00   | 0.33 | 0.21 | 0.17 | 0.32 |
| U68 | 0.00   | 0.16 | 0.00   | 0.11 | 0.17 | 0.17 | 0.17 |
| U69 | 0.00   | 1.77 | 0.00   | 3.70 | 2.80 | 2.88 | 2.34 |
| U70 | 0.00   | 0.96 | 0.00   | 0.98 | 1.88 | 1.88 | 1.93 |
| U71 | 0.00   | 0.00 | 0.00   | 0.11 | 0.33 | 0.32 | 0.16 |
| U72 | 0.00   | 0.00 | 0.00   | 0.00 | 1.19 | 1.17 | 1.56 |
| U73 | 0.00   | 0.96 | 0.00   | 1.09 | 1.26 | 1.25 | 1.08 |
| U74 | 0.00   | 1.93 | 0.00   | 2.40 | 1.08 | 1.10 | 1.04 |
| U76 | 0.00   | 0.16 | 0.00   | 0.22 | 0.61 | 0.59 | 1.10 |
| U75 | 0.00   | 0.00 | 0.00   | 0.00 | 0.32 | 0.30 | 0.65 |
| U77 | 0.00   | 0.48 | 0.00   | 0.54 | 0.44 | 0.47 | 0.53 |
| B6  | 0.00   | 0.00 | 0.00   | 0.00 | 0.12 | 0.18 | 0.02 |
| B7  | 0.00   | 0.00 | 0.00   | 0.00 | 0.38 | 0.47 | 0.02 |
| U79 | 0.00   | 6.10 | 0.00   | 4.47 | 4.62 | 4.70 | 2.95 |
| U81 | 0.00   | 0.48 | 0.00   | 0.65 | 0.81 | 0.89 | 1.46 |
| U82 | 0.00   | 0.00 | 0.00   | 0.00 | 0.36 | 0.39 | 0.89 |
| U83 | 0.00   | 0.00 | 0.00   | 0.00 | 0.89 | 0.81 | 0.45 |
| U85 | 0.00   | 1.44 | 0.00   | 0.87 | 0.55 | 0.57 | 0.34 |
| U84 | 0.00   | 2.09 | 0.00   | 1.63 | 0.65 | 0.68 | 0.63 |
| U86 | 0.00   | 2.41 | 0.00   | 2.72 | 2.09 | 2.21 | 3.16 |
| U90 | 0.00   | 2.57 | 0.00   | 2.72 | 3.76 | 4.18 | 1.67 |
| U91 | 0.00   | 1.44 | 0.00   | 2.51 | 4.18 | 3.20 | 0.33 |



|      |      |      |      |      |      |      |      |
|------|------|------|------|------|------|------|------|
| B8   | 0.00 | 0.00 | 0.00 | 0.00 | 0.00 | 0.00 | 0.05 |
| U94  | 0.00 | 0.00 | 0.00 | 0.00 | 0.17 | 0.20 | 0.11 |
| U95  | 0.00 | 3.05 | 0.00 | 3.92 | 5.23 | 5.45 | 3.16 |
| U100 | 0.00 | 0.16 | 0.00 | 0.22 | 1.78 | 1.58 | 3.76 |
| B9   | 0.00 | 0.00 | 0.00 | 0.00 | 0.00 | 0.00 | 0.18 |

---

Genes are color coded to indicate temporal class of expression, where blue indicates immediate early genes, green indicates late genes, and orange indicates early genes. Unclassified genes remain in black.
